# Supplementary material for: Automatic Contour Refinement for Deep Learning Auto-segmentation of Complex Organs in MRI-guided Adaptive Radiation Therapy
Source: PubMed Central journal article supplement — Adv Radiat Oncol. 2022 Apr 20;7(5):100968. doi: 10.1016/j.adro.2022.100968 (PMC9280040; doi:10.1016/j.adro.2022.100968), 2022-04-20
Supplement: mmc1.pdf [file mmc1.pdf]

## Active contour model

An ACM method based on improved level set<sup>25</sup> was implemented in this work for ACR. This method was originated from the Chan-Vese model,<sup>26</sup> a region-based level set algorithm in which the contour evolves by minimizing an energy functional. For a given image  $I(x, y)$  in the domain  $\Omega$ , let  $C$  represent the segmenting curve. The object of Chan-Vese algorithm is to minimize the following energy functional:

$$F(c_1, c_2, C) = \mu \cdot \text{Length}(C) + \lambda_1 \cdot \int_{\text{inside}(C)} |I(x, y) - c_1|^2 dx dy + \lambda_2 \cdot \int_{\text{outside}(C)} |I(x, y) - c_2|^2 dx dy \quad (1)$$

where  $c_1$  and  $c_2$  are the average intensities inside and outside  $C$ ,  $\mu$ ,  $\lambda_1$  and  $\lambda_2$  are positive constant parameters that are usually determined arbitrarily. This energy minimization problem can be redefined in the level set formulation, which provides an easier and more flexible way to find out the solution.<sup>26</sup> In the level set formulation, the unknown segmenting curve  $C$  is replaced by the level set function  $\phi(x, y)$ :  $\phi(x, y) > 0$  if the point  $(x, y)$  is inside  $C$ ,  $\phi(x, y) < 0$  if  $(x, y)$  is outside  $C$ , and  $\phi(x, y) = 0$  if  $(x, y)$  is on  $C$ . The energy functional (1) can be reformulated in terms of  $\phi(x, y)$ :

$$F(c_1, c_2, \phi) = \mu \cdot \int_{\Omega} \delta(\phi(x, y)) |\nabla \phi(x, y)| dx dy + \lambda_1 \cdot \int_{\Omega} |I(x, y) - c_1|^2 H(\phi(x, y)) dx dy + \lambda_2 \cdot \int_{\Omega} |I(x, y) - c_2|^2 (1 - H(\phi(x, y))) dx dy \quad (2)$$

where  $H(z)$  and  $\delta(z)$  are the Heaviside function and Dirac delta function defined as follows:

$$H(z) = \begin{cases} 1 & \text{if } z \geq 0, \\ 0 & \text{if } z < 0, \end{cases} \quad \delta(z) = \frac{d}{dz} H(z). \quad (3)$$

In (2),  $H(\phi(x, y))$  and  $1 - H(\phi(x, y))$  are used to specify the interior and exterior regions of  $C$ , and  $\delta(\phi(x, y))$  represents the narrow band around  $C$ . The parameter  $\mu$  penalizes the total length of the curve  $C$ , where a larger value can lead to more smooth boundaries. Since this study was designed to accommodate complex abdominal organs, we set  $\mu = 0.01$ . The

weighting parameters  $\lambda_1$  and  $\lambda_2$  can affect the motion of the curve evolution,<sup>27</sup> and the optimal values of these two parameters usually need to be chosen specifically for different cases. In this study, instead of manually adjusting the parameters for a large amount of inaccurate contours, we followed the approach proposed by Hatamizadeh et al.<sup>25</sup> to generalize the scalar parameters  $\lambda_1$  and  $\lambda_2$  to 2D parameter maps using the probability maps obtained from the above DL models. The probability map  $Y_{prob}(x, y)$ , as the output of the CNN segmentation models, specifies the probability of each pixel belonging to the target organ. The 2D  $\lambda_1$  and  $\lambda_2$  maps are calculated using the following equations:

$$\lambda_1(x, y) = \exp\left(\frac{2-Y_{prob}(x,y)}{1+Y_{prob}(x,y)}\right), \quad \lambda_2(x, y) = \exp\left(\frac{1+Y_{prob}(x,y)}{2-Y_{prob}(x,y)}\right). \quad (4)$$

The probability map  $Y_{prob}(x, y)$  is also converted to a signed distance map as the beginning  $\phi(x, y)$  to initialize the level set in ACM. The contour is then evolved iteratively to minimize the energy functional and better match to the desired boundary. For the ACR application in this study, the number of iterations was set to be 600, as large changes were expected for the initial inaccurate contours. For more details on the ACM method, readers are referred to the relevant publications.<sup>25-27</sup>

Table S1. The contour correction performance of MR-SIM scans.

| Organs          | Subregions groups based on initial DSC and MDA | Percentage of subregions with improved DSC and improved MDA after ACR | Percentage of subregions with DSC $\geq 0.8$ and MDA $\leq 3$ mm after ACR | Mean DSC change after ACR    | Mean MDA change (mm) after ACR        | Mean sDSC change after ACR          | Mean APL change (mm) after ACR |
|-----------------|------------------------------------------------|-----------------------------------------------------------------------|----------------------------------------------------------------------------|------------------------------|---------------------------------------|-------------------------------------|--------------------------------|
| Small bowel     | Major errors                                   | 679/844 (80%)                                                         | 82/844 (10%)                                                               | 0.32 → 0.56 *                | 7.72 → 6.11 *                         | 0.28 → 0.43 *                       | 89.04 → 72.16 *                |
|                 | Minor errors                                   | 877/1612 (54%)                                                        | 459/1612 (28%)                                                             | 0.71 → 0.76 *                | 3.71 → 3.65<br>( $p=0.114$ )          | 0.54 → 0.58 *                       | 96.28 → 87.19 *                |
| Large bowel     | Major errors                                   | 450/574 (78%)                                                         | 53/574 (9%)                                                                | 0.33 → 0.56 *                | 8.71 → 7.06 *                         | 0.29 → 0.44 *                       | 79.25 → 63.09 *                |
|                 | Minor errors                                   | 729/1162 (63%)                                                        | 381/1162(33%)                                                              | 0.72 → 0.78 *                | 3.81 → 3.66<br>( $p=0.001$ )          | 0.56 → 0.62 *                       | 71.25 → 58.88 *                |
| Combined bowels | Major errors                                   | 551/622 ( <b>89%</b> )                                                | 83/622 ( <b>13%</b> )                                                      | 0.33 → 0.60 *                | 6.57 → 4.62 *                         | 0.31 → 0.50 *                       | 89.90 → 68.46 *                |
|                 | Minor errors                                   | 1269/1963 ( <b>65%</b> )                                              | 911/1963 ( <b>46%</b> )                                                    | 0.72 → 0.80 *                | 3.09 → 2.81 *                         | 0.59 → 0.66 *                       | 95.45 → 86.22 *                |
| Pancreas        | Major errors                                   | 92/132 (70%)                                                          | 6/132 (5%)                                                                 | 0.32 → 0.51 *                | 6.18 → 5.15 *                         | 0.25 → 0.40 *                       | 66.09 → 48.93 *                |
|                 | Minor errors                                   | 267/573 (67%)                                                         | 140/573 (24%)                                                              | 0.70 → 0.72 *                | <b>3.28 → 3.58 *</b>                  | 0.49 → 0.52 *                       | 59.56 → 46.92 *                |
| Duodenum        | Major errors                                   | 149/236 (63%)                                                         | 7/236 (3%)                                                                 | 0.33 → 0.50 *                | 6.46 → 5.78 *                         | 0.28 → 0.39 *                       | 67.50 → 51.70 *                |
|                 | Minor errors                                   | 245/613 (40%)                                                         | 115/613 (19%)                                                              | 0.69 → 0.70<br>( $p=0.008$ ) | <b>3.31 → 3.79 *</b>                  | <b>0.52 → 0.52</b><br>( $p=0.901$ ) | 52.64 → 43.59 *                |
| Stomach         | Major errors                                   | 37/80 (46%)                                                           | 5/80 (6%)                                                                  | 0.46 → 0.57 *                | <b>10.10 → 10.11</b><br>( $p=0.969$ ) | 0.29 → 0.34<br>( $p=0.014$ )        | 81.58 → 70.89<br>( $p=0.001$ ) |
|                 | Minor errors                                   | 198/428 (46%)                                                         | 86/428 (20%)                                                               | 0.77 → 0.78<br>( $p=0.083$ ) | <b>4.17 → 4.57 *</b>                  | 0.47 → 0.48<br>( $p=0.431$ )        | 96.99 → 85.59 *                |

\* indicates paired t-test  $p$  value  $<0.001$ .

Table S2. The contour correction performance of MRL scans.

| Organs          | Subregions groups based on initial DSC and MDA | Percentage of subregions with improved DSC and improved MDA after ACR | Percentage of subregions with DSC $\geq 0.8$ and MDA $\leq 3$ mm after ACR | Mean DSC change after ACR                | Mean MDA change (mm) after ACR           | Mean sDSC change after ACR               | Mean APL change (mm) after ACR               |
|-----------------|------------------------------------------------|-----------------------------------------------------------------------|----------------------------------------------------------------------------|------------------------------------------|------------------------------------------|------------------------------------------|----------------------------------------------|
| Small bowel     | Major errors                                   | 277/374 (74%)                                                         | 22/374 (6%)                                                                | 0.35 $\rightarrow$ 0.54 *                | 8.96 $\rightarrow$ 7.12 *                | 0.28 $\rightarrow$ 0.41 *                | 130.54 $\rightarrow$ 110.46 *                |
|                 | Minor errors                                   | 239/538 (44%)                                                         | 75/538 (14%)                                                               | 0.69 $\rightarrow$ 0.71 *                | 4.53 $\rightarrow$ 4.98 *                | 0.54 $\rightarrow$ 0.54<br>( $p=0.422$ ) | 103.55 $\rightarrow$ 101.32<br>( $p=0.090$ ) |
| Large bowel     | Major errors                                   | 204/324 (63%)                                                         | 23/324 (7%)                                                                | 0.36 $\rightarrow$ 0.53 *                | 9.86 $\rightarrow$ 9.23<br>( $p=0.002$ ) | 0.30 $\rightarrow$ 0.41 *                | 86.01 $\rightarrow$ 69.10 *                  |
|                 | Minor errors                                   | 226/527 (43%)                                                         | 119/527 (23%)                                                              | 0.71 $\rightarrow$ 0.73<br>( $p=0.030$ ) | 4.23 $\rightarrow$ 4.83 *                | 0.56 $\rightarrow$ 0.56<br>( $p=0.827$ ) | 68.04 $\rightarrow$ 62.62 *                  |
| Combined bowels | Major errors                                   | 202/278 (73%)                                                         | 22/278 (8%)                                                                | 0.39 $\rightarrow$ 0.57 *                | 8.03 $\rightarrow$ 6.60 *                | 0.33 $\rightarrow$ 0.46 *                | 111.66 $\rightarrow$ 95.60 *                 |
|                 | Minor errors                                   | 437/962 (45%)                                                         | 233/962 (24%)                                                              | 0.72 $\rightarrow$ 0.76 *                | 3.88 $\rightarrow$ 4.29 *                | 0.57 $\rightarrow$ 0.59<br>( $p=0.001$ ) | 111.48 $\rightarrow$ 112.39<br>( $p=0.513$ ) |
| Pancreas        | Major errors                                   | 68/72 (94%)                                                           | 17/72 (24%)                                                                | 0.32 $\rightarrow$ 0.64 *                | 8.15 $\rightarrow$ 3.87 *                | 0.20 $\rightarrow$ 0.51 *                | 96.02 $\rightarrow$ 55.65 *                  |
|                 | Minor errors                                   | 149/194 (77%)                                                         | 76/194 (39%)                                                               | 0.68 $\rightarrow$ 0.78 *                | 4.38 $\rightarrow$ 3.34 *                | 0.42 $\rightarrow$ 0.51 *                | 82.66 $\rightarrow$ 62.35 *                  |
| Duodenum        | Major errors                                   | 35/66 (53%)                                                           | 2/66 (3%)                                                                  | 0.31 $\rightarrow$ 0.47 *                | 7.64 $\rightarrow$ 7.15<br>( $p=0.215$ ) | 0.24 $\rightarrow$ 0.30<br>( $p=0.012$ ) | 63.23 $\rightarrow$ 54.82 *                  |
|                 | Minor errors                                   | 50/195 (26%)                                                          | 28/195 (14%)                                                               | 0.70 $\rightarrow$ 0.66 *                | 3.81 $\rightarrow$ 5.18 *                | 0.55 $\rightarrow$ 0.46 *                | 47.14 $\rightarrow$ 48.47<br>( $p=0.363$ )   |
| Stomach         | Major errors                                   | 17/31 (55%)                                                           | 1/31 (3%)                                                                  | 0.40 $\rightarrow$ 0.55 *                | 9.62 $\rightarrow$ 8.92<br>( $p=0.280$ ) | 0.21 $\rightarrow$ 0.28<br>( $p=0.030$ ) | 93.73 $\rightarrow$ 78.05 *                  |
|                 | Minor errors                                   | 36/173 (21%)                                                          | 13/173 (8%)                                                                | 0.78 $\rightarrow$ 0.76 *                | 4.31 $\rightarrow$ 5.72 *                | 0.45 $\rightarrow$ 0.38 *                | 96.02 $\rightarrow$ 102.30<br>( $p=0.006$ )  |

\* indicates paired t-test  $p$  value  $<0.001$ .

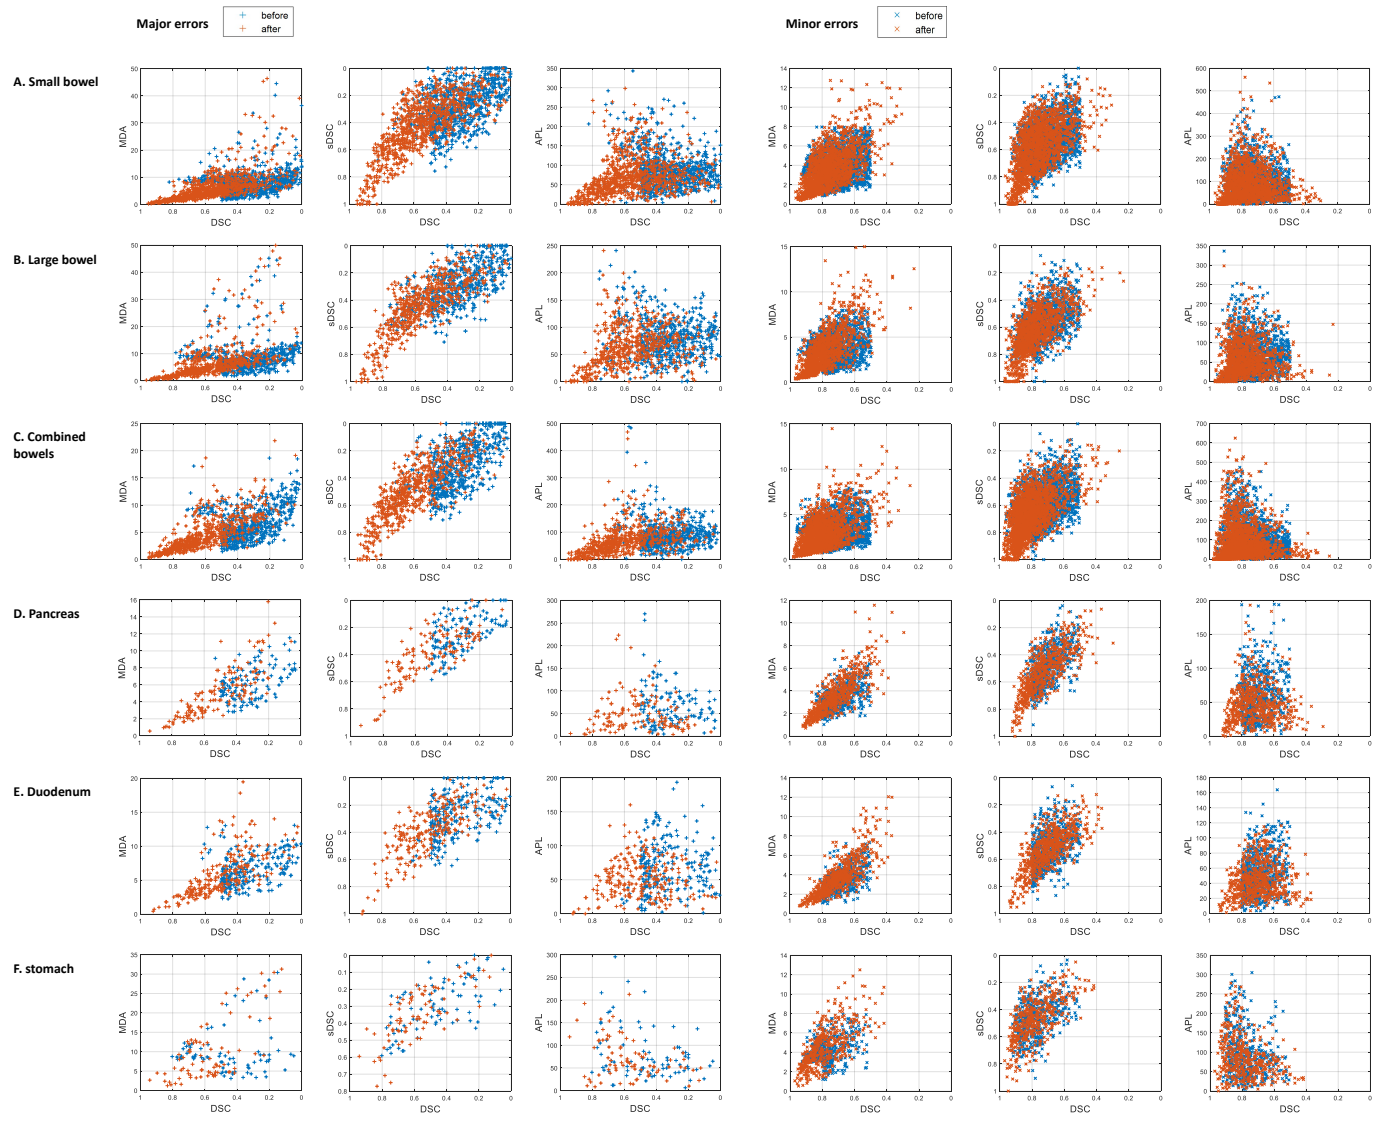

Figure S1. Changes of the contour accuracy metrics for MR-SIM data before and after the ACR process.

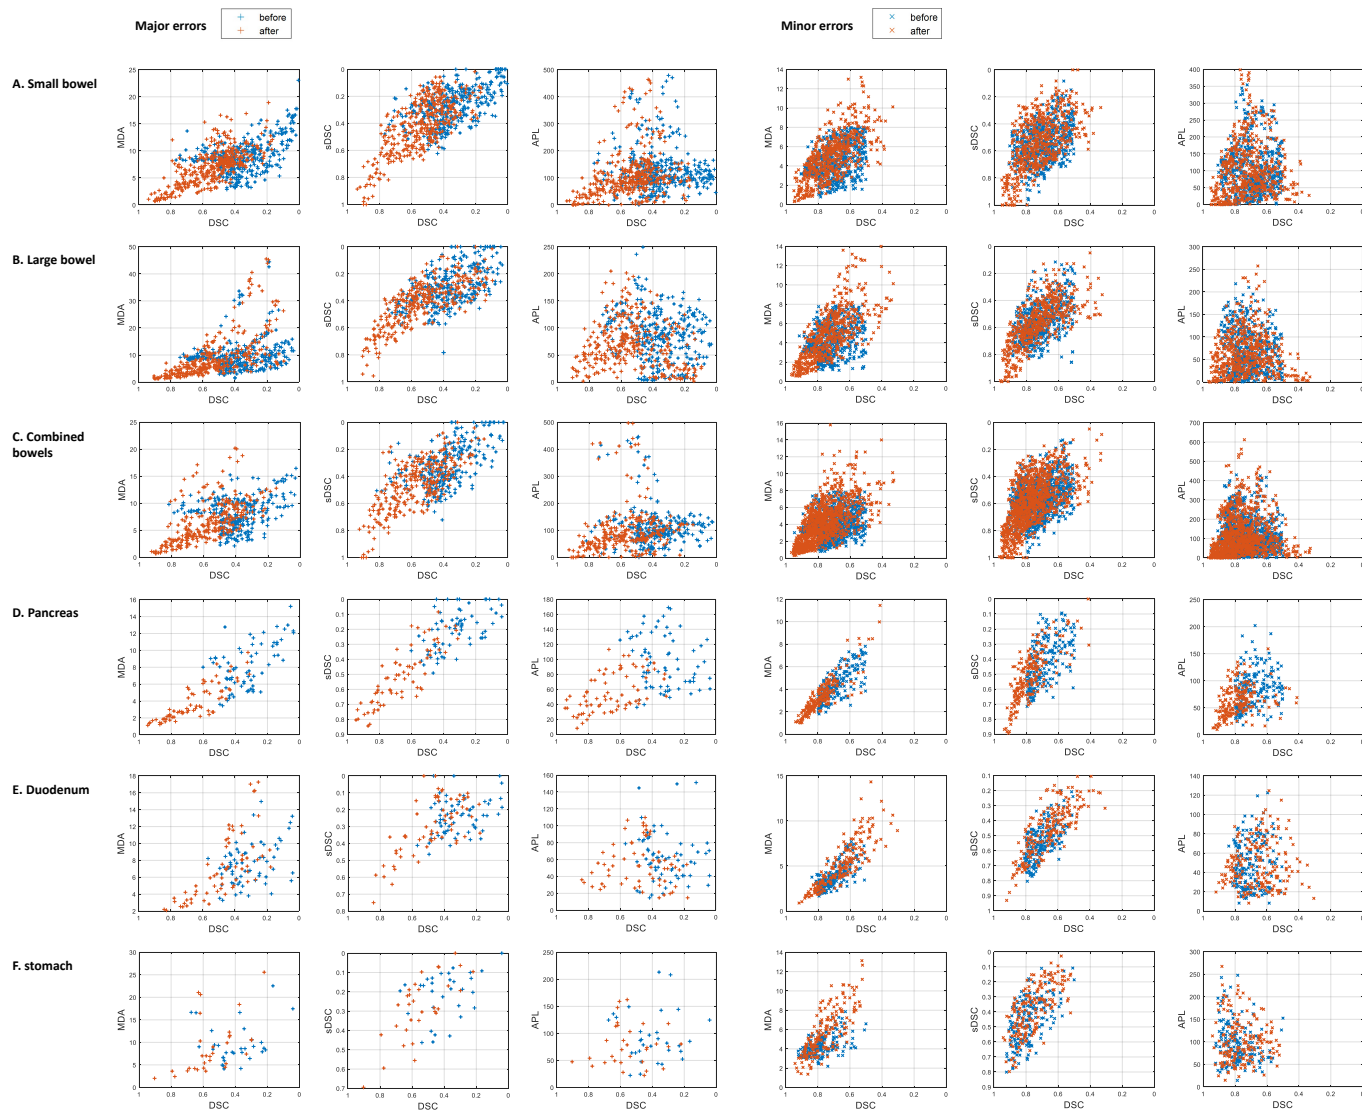

Figure S2. Changes of the contour accuracy metrics for MRL data before and after the ACR process.
